# Supplementary material
Source: PubMed Central journal article supplement (PMC7737152)
Supplement: jamainternmed-e207071-s001.pdf [file jamainternmed-e207071-s001.pdf]

## Supplementary Online Content

Holmgren AJ, Downing NL, Bates DW, et al. Assessment of electronic health record use between US and non-US health systems. *JAMA Intern Med*. Published online December 14, 2020.  
doi:10.1001/jamainternmed.2020.7071

**eFigure.** Note Text by Templates, Copy/Paste, and Manual Entry

**eTable 1.** Regression Results Excluding Western Europe

**eTable 2.** Regression Results Excluding Canada

**eTable 3.** EHR Time Per Encounter

**eTable 4.** EHR Time Per Appointment: Time per Day Divided by Average Number of Clinician Appointments per Day

This supplementary material has been provided by the authors to give readers additional information about their work.

**eFigure.** Note Text by Templates, Copy/Paste, and Manual Entry

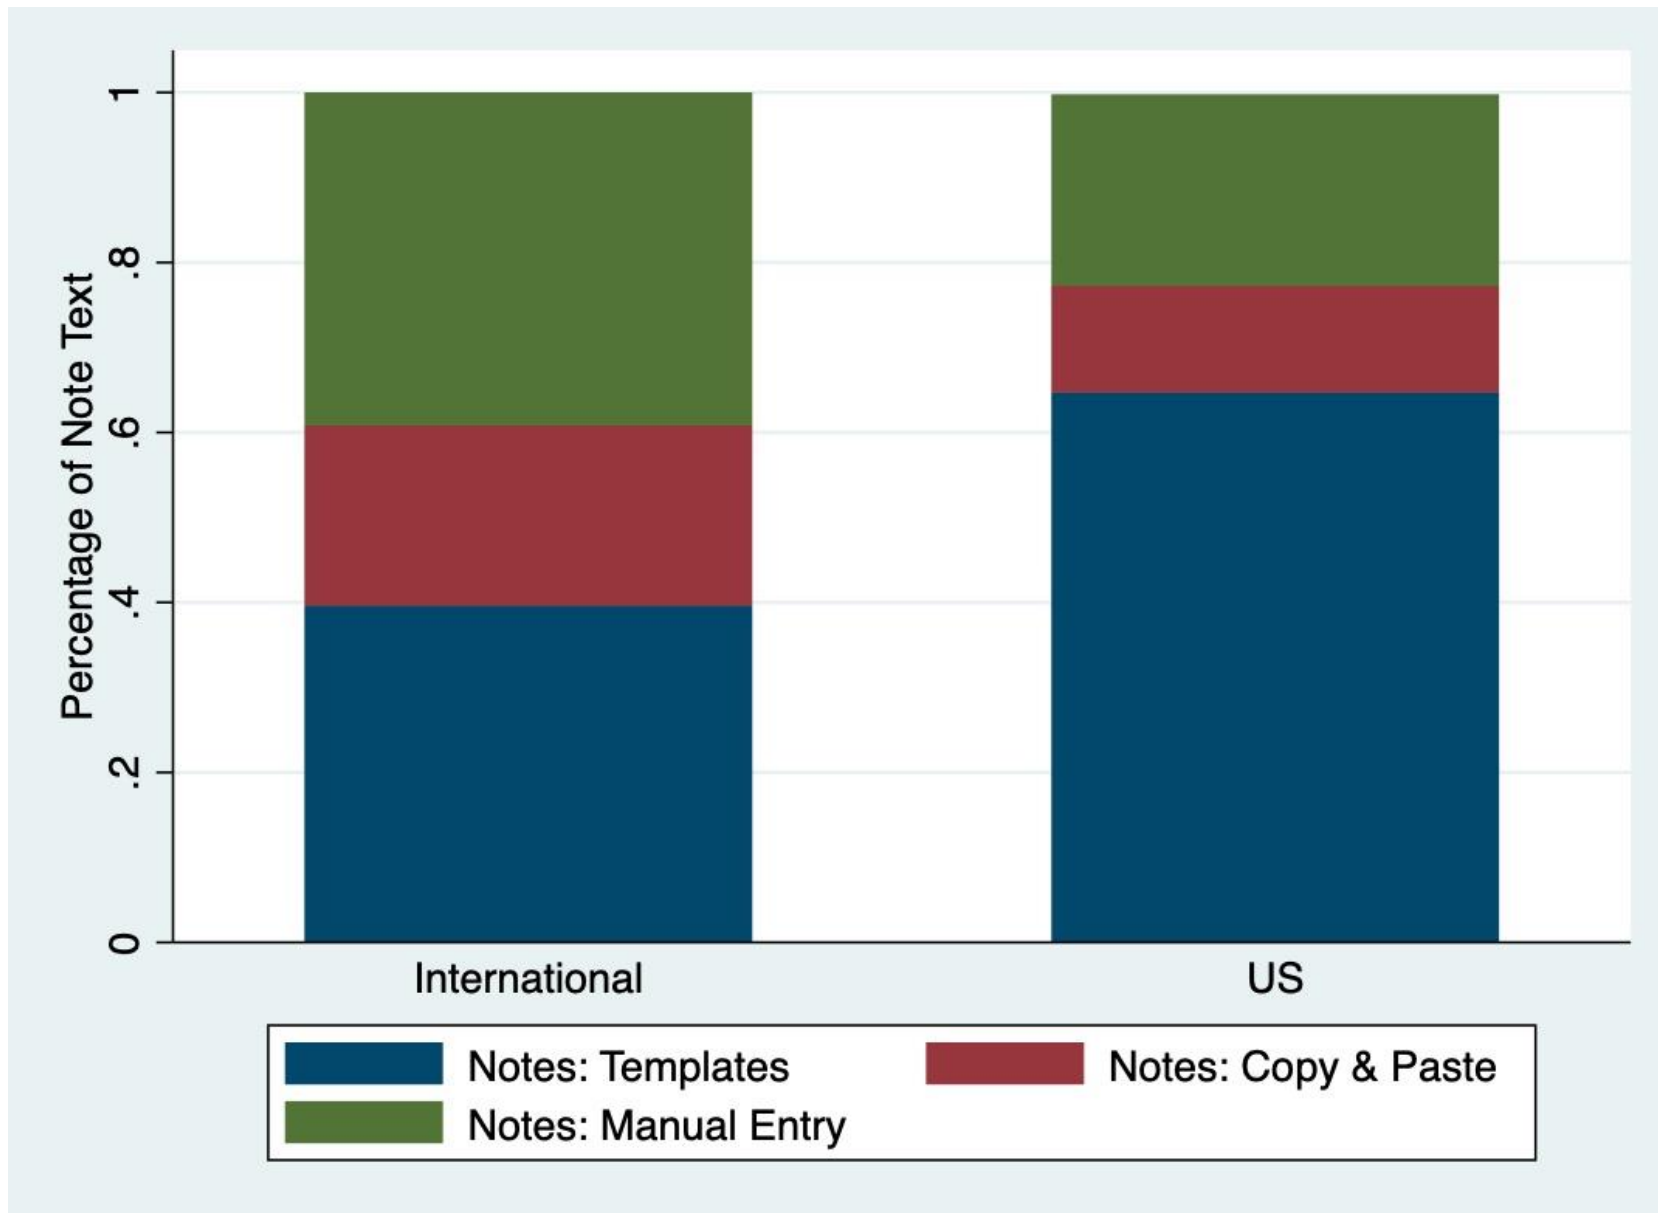

**eTable 1. Regression Results Excluding Western Europe**

|                                 | DV: Total EHR Time per Day (Minutes) |                  | DV: After-Hours Time per Day (Minutes) |                  | DV: % of Note Text from Automated Sources |                  | DV: System Messages per Day |             |
|---------------------------------|--------------------------------------|------------------|----------------------------------------|------------------|-------------------------------------------|------------------|-----------------------------|-------------|
|                                 | Coef.                                | p-value          | Coef.                                  | p-value          | Coef.                                     | p-value          | Coef.                       | p-value     |
| <b>Country</b>                  |                                      |                  |                                        |                  |                                           |                  |                             |             |
| International Providers         | Reference                            |                  | Reference                              |                  | Reference                                 |                  | Reference                   |             |
| <b>US Providers</b>             | <b>32.02</b>                         | <b>&lt;0.001</b> | <b>10.98</b>                           | <b>&lt;0.001</b> | <b>0.19</b>                               | <b>&lt;0.001</b> | <b>4.03</b>                 | <b>0.01</b> |
| <b>Organizational Structure</b> |                                      |                  |                                        |                  |                                           |                  |                             |             |
| Ambulatory Only                 | Reference                            |                  | Reference                              |                  | Reference                                 |                  | Reference                   |             |
| Hospital & Clinic               | -21.87                               | <0.001           | -2.36                                  | 0.26             | 0.00                                      | 0.85             | 4.81                        | <0.001      |
| Other                           | -19.99                               | <0.001           | -1.22                                  | 0.67             | 0.00                                      | 0.97             | 3.52                        | 0.10        |
| <b>Organizational Type</b>      |                                      |                  |                                        |                  |                                           |                  |                             |             |
| Academic Medical Center         | Reference                            |                  | Reference                              |                  | Reference                                 |                  | Reference                   |             |
| Ambulatory Only                 | 4.84                                 | 0.64             | -4.81                                  | 0.20             | 0.04                                      | 0.26             | 3.09                        | 0.25        |
| Community Hospital              | 13.89                                | <0.001           | -0.18                                  | 0.82             | 0.01                                      | 0.27             | 0.81                        | 0.16        |
| Other                           | 24.22                                | <0.001           | 0.52                                   | 0.72             | 0.02                                      | 0.24             | -0.24                       | 0.80        |
| Pediatric Only Facility         | -3.22                                | 0.26             | 0.63                                   | 0.69             | 0.01                                      | 0.66             | -3.85                       | 0.00        |
| Safety Net Provider             | 15.26                                | <0.001           | -0.77                                  | 0.56             | -0.02                                     | 0.39             | 1.23                        | 0.22        |
| <b>Health Plan Integration</b>  |                                      |                  |                                        |                  |                                           |                  |                             |             |
| No Integrated Health Plan       | Reference                            |                  | Reference                              |                  | Reference                                 |                  | Reference                   |             |
| Integrated Health Plan          | 3.46                                 | 0.07             | 0.36                                   | 0.68             | 0.01                                      | 0.56             | -0.11                       | 0.87        |
| <b>Size</b>                     |                                      |                  |                                        |                  |                                           |                  |                             |             |
| Physicians                      | 0.00                                 | 0.81             | 0.00                                   | 0.00             | 0.00                                      | 0.13             | 0.00                        | 0.45        |
| Outpatient Visits               | 0.00                                 | 0.26             | 0.00                                   | 0.99             | 0.00                                      | 0.33             | 0.00                        | 0.23        |

**eTable 2.** Regression Results Excluding Canada

|                                 | DV: Total EHR Time per Day (Minutes) |                  | DV: After-Hours Time per Day (Minutes) |             | DV: % of Note Text from Automated Sources |                  | DV: System Messages per Day |                  |
|---------------------------------|--------------------------------------|------------------|----------------------------------------|-------------|-------------------------------------------|------------------|-----------------------------|------------------|
|                                 | Coef.                                | p-value          | Coef.                                  | p-value     | Coef.                                     | p-value          | Coef.                       | p-value          |
| <b>Country</b>                  |                                      |                  |                                        |             |                                           |                  |                             |                  |
| International Providers         | Reference                            |                  | Reference                              |             | Reference                                 |                  | Reference                   |                  |
| <b>US Providers</b>             | <b>18.94</b>                         | <b>&lt;0.001</b> | <b>6.40</b>                            | <b>0.04</b> | <b>0.16</b>                               | <b>&lt;0.001</b> | <b>7.25</b>                 | <b>&lt;0.001</b> |
| <b>Organizational Structure</b> |                                      |                  |                                        |             |                                           |                  |                             |                  |
| Ambulatory Only                 | Reference                            |                  | Reference                              |             | Reference                                 |                  | Reference                   |                  |
| Hospital & Clinic               | -21.23                               | <0.001           | -2.21                                  | 0.32        | 0.00                                      | 0.94             | 5.00                        | <0.001           |
| Other                           | -19.64                               | 0.00             | -1.13                                  | 0.70        | 0.00                                      | 0.92             | 3.71                        | 0.08             |
| <b>Organizational Type</b>      |                                      |                  |                                        |             |                                           |                  |                             |                  |
| Academic Medical Center         | Reference                            |                  | Reference                              |             | Reference                                 |                  | Reference                   |                  |
| Ambulatory Only                 | 5.28                                 | 0.61             | -4.71                                  | 0.22        | 0.04                                      | 0.24             | 3.22                        | 0.23             |
| Community Hospital              | 13.88                                | <0.001           | -0.24                                  | 0.77        | 0.01                                      | 0.26             | 0.69                        | 0.22             |
| Other                           | 25.35                                | <0.001           | 1.29                                   | 0.50        | 0.02                                      | 0.20             | -0.37                       | 0.68             |
| Pediatric Only Facility         | -4.48                                | 0.09             | 0.21                                   | 0.88        | 0.01                                      | 0.74             | -3.61                       | 0.00             |
| Safety Net Provider             | 15.52                                | <0.001           | -0.66                                  | 0.63        | -0.02                                     | 0.41             | 1.18                        | 0.24             |
| <b>Health Plan Integration</b>  |                                      |                  |                                        |             |                                           |                  |                             |                  |
| No Integrated Health Plan       | Reference                            |                  | Reference                              |             | Reference                                 |                  | Reference                   |                  |
| Integrated Health Plan          | 3.56                                 | 0.06             | 0.40                                   | 0.65        | 0.01                                      | 0.55             | -0.13                       | 0.84             |
| <b>Size</b>                     |                                      |                  |                                        |             |                                           |                  |                             |                  |
| Physicians                      | 0.00                                 | 0.77             | 0.00                                   | 0.04        | 0.00                                      | 0.20             | 0.00                        | 0.65             |
| Outpatient Visits               | 0.00                                 | 0.19             | 0.00                                   | 0.76        | 0.00                                      | 0.40             | 0.00                        | 0.16             |

**eTable 3. EHR Time Per Encounter**

|                                 | <b>DV: Total EHR Time per Encounter (Minutes)</b> |             |
|---------------------------------|---------------------------------------------------|-------------|
|                                 | Coef.                                             | p-value     |
| <b>Country</b>                  |                                                   |             |
| International Providers         | Reference                                         |             |
| <b>US Providers</b>             | <b>1.11</b>                                       | <b>0.01</b> |
| <b>Organizational Structure</b> |                                                   |             |
| Ambulatory Only                 | Reference                                         |             |
| Hospital & Clinic               | 0.19                                              | 0.75        |
| Other                           | 2.42                                              | 0.10        |
| <b>Organizational Type</b>      |                                                   |             |
| Academic Medical Center         | Reference                                         |             |
| Ambulatory Only                 | -1.28                                             | 0.32        |
| Community Hospital              | -1.04                                             | 0.00        |
| Other                           | -1.25                                             | 0.01        |
| Pediatric Only Facility         | 1.03                                              | 0.48        |
| Safety Net Provider             | 0.50                                              | 0.33        |
| <b>Health Plan Integration</b>  |                                                   |             |
| No Integrated Health Plan       | Reference                                         |             |
| Integrated Health Plan          | 0.49                                              | 0.08        |
| <b>Size</b>                     |                                                   |             |
| Physicians                      | 0.00                                              | 0.03        |
| Outpatient Visits               | 0.00                                              | 0.07        |

**eTable 4. EHR Time Per Appointment: Time per Day Divided by Average Number of Clinician Appointments per Day**

|                                 | <b>DV: Total EHR Time per Encounter (Minutes)</b> |                  |
|---------------------------------|---------------------------------------------------|------------------|
|                                 | Coef.                                             | p-value          |
| <b>Country</b>                  |                                                   |                  |
| International Providers         | Reference                                         |                  |
| <b>US Providers</b>             | <b>1.98</b>                                       | <b>&lt;0.001</b> |
| <b>Organizational Structure</b> |                                                   |                  |
| Ambulatory Only                 | Reference                                         |                  |
| Hospital & Clinic               | -0.12                                             | 0.79             |
| Other                           | 1.14                                              | 0.17             |
| <b>Organizational Type</b>      |                                                   |                  |
| Academic Medical Center         | Reference                                         |                  |
| Ambulatory Only                 | 3.40                                              | 0.08             |
| Community Hospital              | 0.17                                              | 0.47             |
| Other                           | 0.51                                              | 0.18             |
| Pediatric Only Facility         | 1.46                                              | 0.05             |
| Safety Net Provider             | 1.32                                              | 0.01             |
| <b>Health Plan Integration</b>  |                                                   |                  |
| No Integrated Health Plan       | Reference                                         |                  |
| Integrated Health Plan          | 0.35                                              | 0.21             |
| <b>Size</b>                     |                                                   |                  |
| Physicians                      | 0.00                                              | 0.09             |
| Outpatient Visits               | 0.00                                              | 0.33             |
